# Supplementary material for: A new point-of-care test for the rapid detection of urinary tract infections
Source: Springer Nature journal article supplement (doi:10.1007/s10096-019-03728-3), 2019-11-09
Supplement: MOESM1 [file 17370188]

**Title:** A new point-of-care test for the rapid detection of urinary tract infections.

**Journal name:** European Journal of Clinical Microbiology and Infectious Diseases.

**Authors:** Alyexandra Arienzo<sup>1</sup>, Valentina Cellitti<sup>2</sup>, Valeria Ferrante<sup>2</sup>, Francesca Losito<sup>2</sup>, Ottavia Stalio<sup>1</sup>, Lorenza Murgia<sup>1</sup>, Rossella Marino<sup>3</sup>, Flavia Cristofano<sup>3</sup>, Michela Orrù<sup>2</sup>, Paolo Visca<sup>1</sup>, Salvatore Di Somma<sup>3</sup>, Lorena Silvestri<sup>4</sup>, Vincenzo Ziparo<sup>4</sup>, Giovanni Antonini<sup>1,2</sup>#

**Affiliations:** <sup>1</sup>Science Department, Università degli Studi Roma Tre, Rome, Italy; <sup>2</sup>Interuniversity Consortium “Istituto Nazionale Biostrutture e Biosistemi” (INBB), Rome, Italy; <sup>3</sup>Emergency Medicine, Department of Medical-Surgery Sciences and Translational Medicine, Università La Sapienza of Rome, Azienda Ospedaliera Sant’Andrea, Rome, Italy; <sup>4</sup>Istituto Dermatologico dell’Immacolata, Rome, Italy

**Corresponding author:**

Prof. Giovanni Antonini, MD PhD, Science Department, Università degli Studi Roma Tre, Viale G. Marconi 446, 00146 Rome, Italy;

Telephone number: 0039 06 5733 6428

Email address: giovanni.antonini@uniroma3.it

**Table for Reviewer perusal**

Results obtained with the MBS POCT for artificially contaminated urine samples

|                                    | <b>MBS time for color change<br/>(h)</b> | <b>Standard deviation</b> | <b>Bacterial concentration<br/>(Log CFU/ml)</b> |
|------------------------------------|------------------------------------------|---------------------------|-------------------------------------------------|
| <i>E. coli</i><br>ATCC 25992       | 0.64                                     | 0.27                      | 9.59                                            |
|                                    | 1.38                                     | 0.04                      | 8.59                                            |
|                                    | 3.02                                     | 0.08                      | 7.59                                            |
|                                    | 4.42                                     | 0.04                      | 6.59                                            |
|                                    | 5.83                                     | 0.08                      | 5.59                                            |
|                                    | 6.46                                     | 0.24                      | 4.59                                            |
|                                    | 7.97                                     | 0.18                      | 3.59                                            |
|                                    | 9.03                                     | 0.21                      | 2.65                                            |
|                                    | 9.84                                     | 0.02                      | 1.50                                            |
|                                    | 11.09                                    | 0.23                      | 0.60                                            |
| <i>E. faecalis</i> ATCC<br>29212   | 0.53                                     | 0.08                      | 8.68                                            |
|                                    | 1.44                                     | 0.04                      | 7.68                                            |
|                                    | 3.50                                     | 0.28                      | 6.68                                            |
|                                    | 4.10                                     | 0.00                      | 5.68                                            |
|                                    | 5.77                                     | 0.24                      | 4.68                                            |
|                                    | 7.50                                     | 0.08                      | 3.68                                            |
|                                    | 8.82                                     | 0.16                      | 2.82                                            |
|                                    | 10.59                                    | 0.13                      | 1.74                                            |
|                                    | 11.65                                    | 0.13                      | 0.78                                            |
| <i>P. aeruginosa</i> ATCC<br>27853 | 0.55                                     | 0.07                      | 9.34                                            |
|                                    | 2.27                                     | 0.08                      | 8.60                                            |
|                                    | 4.62                                     | 0.17                      | 7.86                                            |
|                                    | 5.95                                     | 0.16                      | 7.12                                            |
|                                    | 7.07                                     | 0.12                      | 6.38                                            |
|                                    | 8.55                                     | 0.26                      | 5.64                                            |
|                                    | 9.73                                     | 0.13                      | 4.90                                            |
|                                    | 10.38                                    | 0.14                      | 4.16                                            |
|                                    | 12.60                                    | 0.21                      | 3.42                                            |
| 13.66                              | 0.08                                     | 2.68                      |                                                 |
| <i>S. aureus</i> ATCC 12600        | 0.38                                     | 0.05                      | 8.92                                            |
|                                    | 1.58                                     | 0.00                      | 8.18                                            |
|                                    | 2.36                                     | 0.21                      | 7.44                                            |
|                                    | 3.30                                     | 0.08                      | 6.70                                            |
|                                    | 4.83                                     | 0.21                      | 5.96                                            |
|                                    | 6.81                                     | 0.08                      | 5.22                                            |
|                                    | 8.85                                     | 0.04                      | 4.48                                            |
|                                    | 10.46                                    | 0.04                      | 3.74                                            |
|                                    | 12.77                                    | 0.04                      | 3.00                                            |
|                                    | 14.50                                    | 0.52                      | 2.33                                            |
